# Supplementary material
Source: PubMed Central journal article supplement (PMC3824112)
Supplement: mmc1.pdf [file mmc1.pdf]

The American Journal of Human Genetics, Volume 93

## **Supplemental Data**

### ***WDR34* Mutations that Cause Short Rib-Polydactyly**

### **Syndrome Type III/Severe Asphyxiating Thoracic**

### **Dysplasia Reveal a Role for the NF- $\kappa$ B Pathway in Cilia**

Céline Huber, Sulin Wu, Ashley S. Kim, Sabine Sigaudy, Anna Sarukhanov, Valérie Serre, Genevieve Baujat, Kim-Hanh Le Quan Sang, David L. Rimoin, Daniel H. Cohn, Arnold Munnich, Deborah Krakow, and Valérie Cormier-Daire

## Supplemental Data

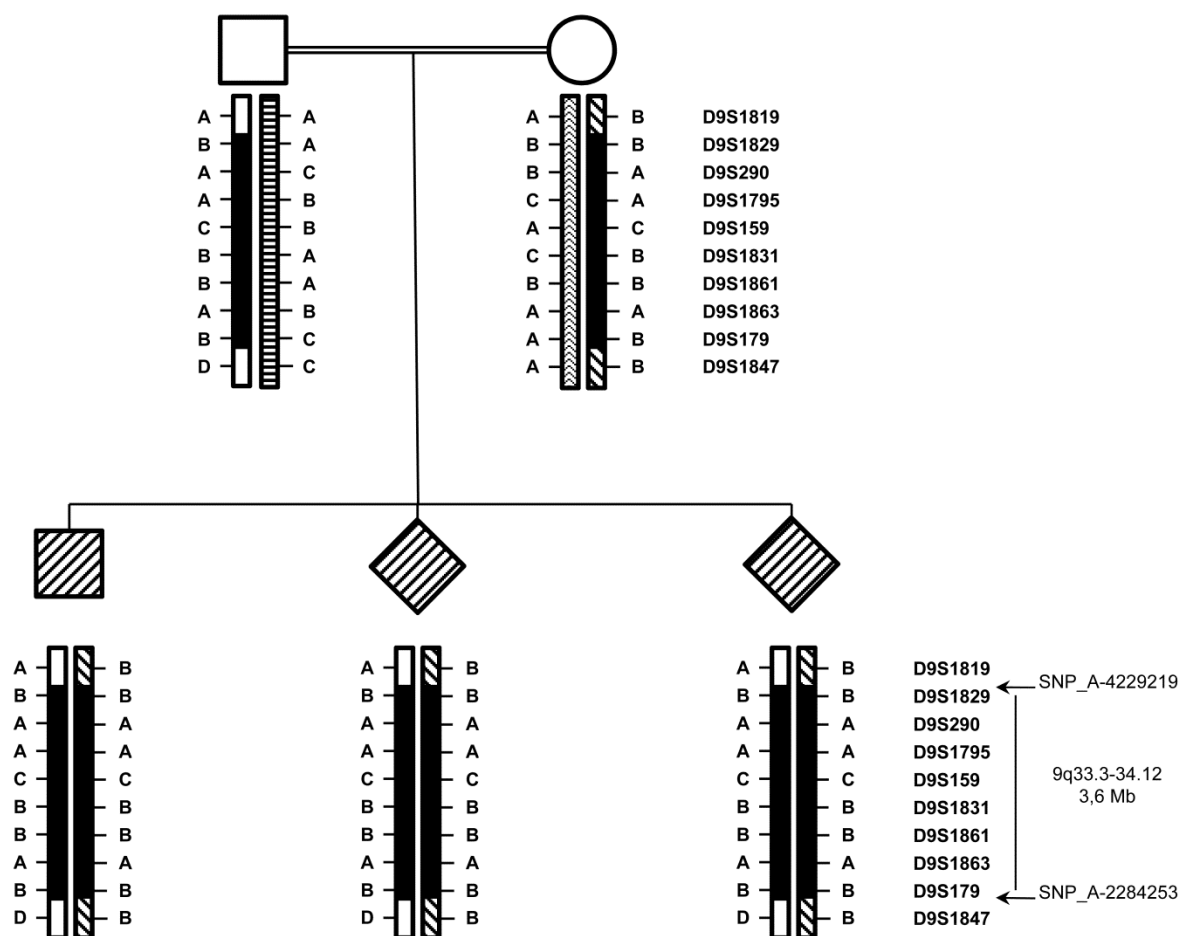

**Figure S1. Pedigree and haplotype of family 1 at 9q33.3-34.12**

Combining a genome-wide homozygosity mapping (1000 markers, decode genetics) and a GeneChip Human Mapping 250K array, we identified a single region of homozygosity shared by the three individuals on chromosome 9. A critical region of homozygosity of 3.6 Mb was delineated by SNP\_A-4229219 and SNP\_A-2284253.

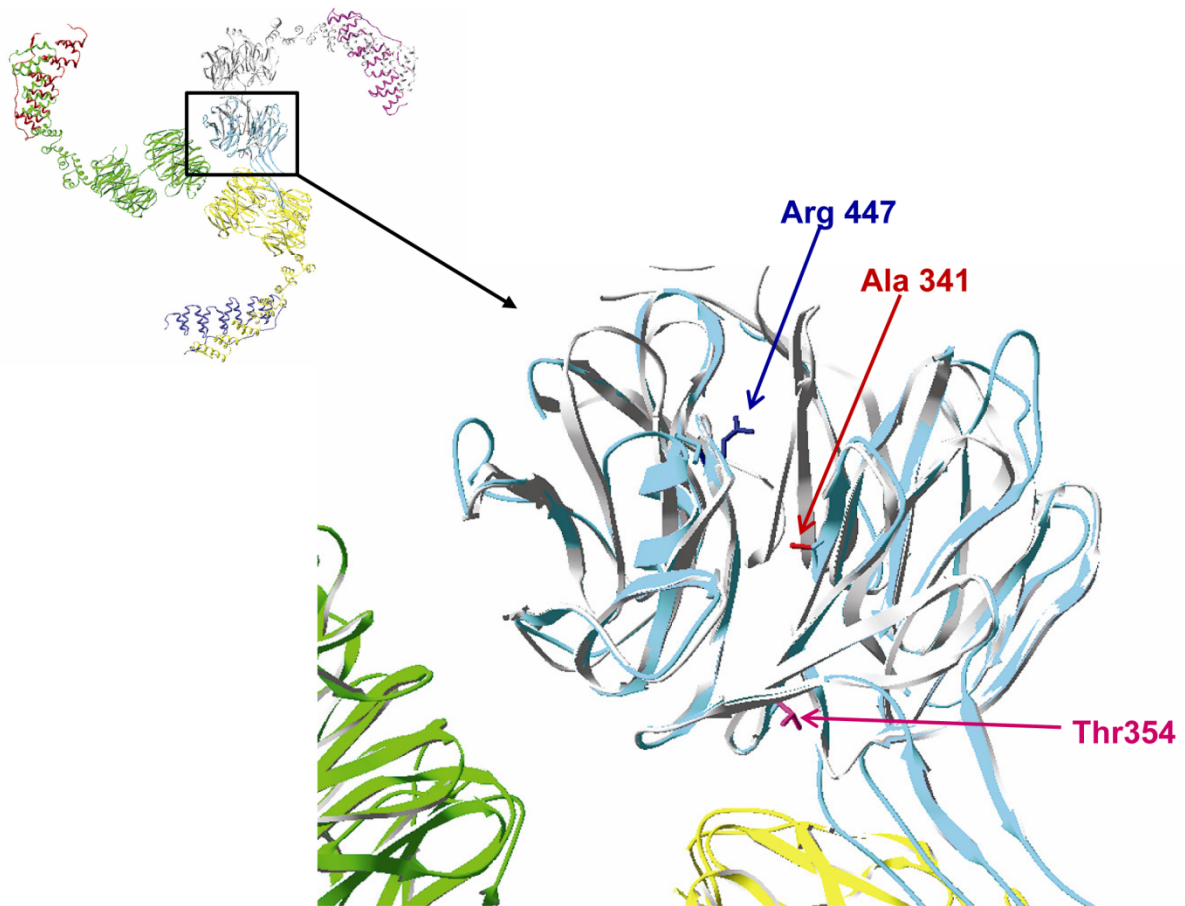

**Figure S2. Three-dimensional structural model of WDR34 via Swiss-Pdb Viewer 3.7 representation.**

This model highlights the consequences of two of the three mutations: the p.Thr354Met substitution is located in an area that is important for interactions at the triskelion center; the p.Arg447Trp substitution is located in the fourth WD40-repeat (residues 424-464). The functional impact for the p.Ala341Val substitution is not clear from this model.
